# Supplementary material
Source: publisher site journal article supplement (https://www.dovepress.com/article/392398)
Supplement: Supplementary file 1 [file get_supplementary_file.php]

PATIENT EXPERIENCE EVALUATION OF THE CMO-BASED PHARMACEUTICAL CARE MODEL VS USUAL CARE IN PEOPLE LIVING WITH HIV_**Supplementary Material**

**Supplementary Table 1.** Evaluation of patient satisfaction using the EVASAF questionnaire. Scores represent median and interquartile range [IQR].

| **EVASAF score** | **Traditional** | **CMO** | ***p*-value** |
| --- | --- | --- | --- |
| Overall score | 44 [5] | 48 [6] | < 0.001 |
| I have better knowledge of the medicines that I am taking | 4 [1] | 5 [1] | 0.025 |
| I know the medicines that I can and cannot take in case of interactions. The pharmacist asks me about my concomitant medication | 4 [1] | 5 [1] | < 0.001 |
| I am more aware of the importance of compliance with my treatment | 5 [1] | 5 [0] | 0.063 |
| I have better knowledge of the possible adverse events related to my medication | 4 [2] | 5 [1] | 0.001 |
| I have been able to reduce the number of adverse events thanks to a better explanation about them | 4 [1] | 5 [1] | 0.003 |
| I notice the pharmacist’s involvement in my health issue | 5 [1] | 5 [1] | 0.732 |
| I would continue attending the PC visits to carry on with my medicines follow-up program | 5 [1] | 5 [0] | 0.030 |
| I would suggest to the GP/specialist that they continue working together with the pharmacist because I trust him/her | 5 [0.75] | 5 [0] | 0.002 |
| The PC was conducted privately | 5 [0] | 5 [1] | 0.920 |
| I am satisfied with the PC that I have received | 5 [0] | 5 [0] | 0.016 |
| **CMO**: Capacity- Motivation-Opportunity model; **GP**: general practitioner; **PC**: pharmaceutical care | | | |

**Supplementary Table 2.** Exploratory analysis of the differences in satisfaction according to the EVASAF questionnaire. Inferential analysis with linear regression. Model 1: simple analysis of the group. Model 2: adjusted by age and level of studies. Model 3: adjusted by CD4 cell counts and baseline viral loads. Model 4: adjusted by age, level of studies, CD4 cell counts and baseline viral loads.

| Model | Estimate | 95% CI | p-value |
| --- | --- | --- | --- |
| 1 | 2.532 | (1.069 - 3.994) | 0.001 |
| 2 | 2.076 | (0.681 - 3.471) | 0.004 |
| 3 | 1.861 | (0.061 - 3.661) | 0.043 |
| 4 | 1.486 | (-0.195 - 3.168) | 0.082 |
| CI: confidence interval |  |  |  |

**Supplementary Figure 1**. Flowchart specifying the number of patients whose results were available for each parameter (missing values are excluded).

158

Patient satisfaction (EVASAF)

31

65

Traditional

CMO

Patient experience (IEXPAC)

60

76

32

39

blood

pressure

HDL

Clinical outcomes

cholesterol

triglycerides

HbA1c

63

87

34

74

63

87

33

74

61

86

31

74

8

46

7

39

56

77

29

69

Patient adherence

adherence to ART

adherence to concomitant medication

primary adherence

secondary adherence

62

85

35

74

39

63

25

60

42

65

27

59

39

65

27

59

Viro-immunological control

CD4 cell counts

CD4/CD8 ratio

Viral

load

64

87

37

74

57

87

30

74

64

87

37

74

151

**HDL**: high-density lipoproteins; **HBA1c**: glycated haemoglobin.
